# Supplementary material for: TreeCluster: Clustering biological sequences using phylogenetic trees
Source: PubMed Central journal article supplement (PMC6705769; doi:10.1371/journal.pone.0221068), 2019-08-22

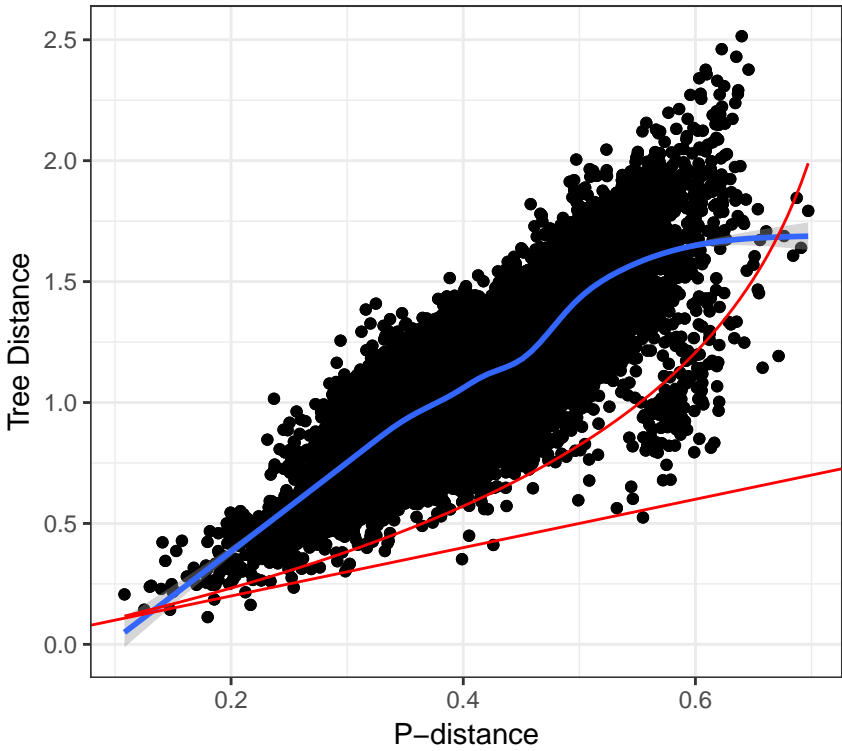

Supplement: pone.0221068.s002.pdf [file pone.0221068.s002.pdf]
