# Supplementary material for: TreeCluster: Clustering biological sequences using phylogenetic trees
Source: PubMed Central journal article supplement (PMC6705769; doi:10.1371/journal.pone.0221068), 2019-08-22
Supplement: pone.0221068.s004.pdf [file pone.0221068.s004.pdf]

# Proofs and supplementary algorithms

750

## Proofs for the Max-diameter min-cut partitioning problem

751

*Proof for Theorem 1.* We use induction. The base case for the induction is the simple rooted tree with root  $u$  and two leaves  $u_l$  and  $u_r$ . If  $w_l + w_r > \alpha$  the algorithm cuts the longer branch whereas if  $w_l + w_r \leq \alpha$  no branch is cut. In both cases, the theorem holds.

752

753

754

The inductive hypothesis is that for a node  $u$ , the algorithm has computed  $A(u_l)$ ,  $A(u_r)$ ,  $B(u_l)$ , and  $B(u_r)$  optimally. We need to prove that a solution other than the one computed by our algorithm *i*) cannot have a lower number of clusters, call it  $A'(u)$ , and *ii*) when  $A'(u) = A(u)$ , cannot have a lower distance to the farthest connected leaf, call it  $B'(u)$ .

755

756

757

758

759

When  $B(u_l) + w_l + B(u_r) + w_r \leq \alpha$ , we have  $A(u) = A(u_l) + A(u_r) - 1$ , which is the minimum possible by inductive hypothesis and the fact that the number of clusters cannot go down by more than one on node  $u$ . Also,  $B(u)$  is optimal by construction.

760

761

762

When  $B(u_l) + w_l + B(u_r) + w_r > \alpha$ , without loss of generality, assume that  $B(u_l) + w_l \geq B(u_r) + w_r$  and thus, the algorithm cuts the  $(u, u_l)$  branch, getting  $A(u) = A(u_l) + A(u_r)$  and  $B(u) = B(u_r) + w_r$ . Note that  $A'(u) < A(u)$  is only possible if  $A'(u_l) = A(u_l)$  and  $A'(u_r) = A(u_r)$  and we do not cut any branch at  $u$  in the alternative clustering. However, this scenario is *not* possible because

$$B'(u_l) + w_l + B'(u_r) + w_r \geq B(u_l) + w_l + B(u_r) + w_r > \alpha$$

where the first inequality follows from the inductive hypothesis and the final inequality shows that we will have to cut a branch in any alternative setting. Finally, we need to show that an alternative solution with  $A'(u) = A(u)$  but  $B'(u) < B(u)$  is not possible. The inequality requires that either  $B'(u_l) < B(u_l)$  or  $B'(u_r) < B(u_r)$ . First, consider the  $B'(u_l) < B(u_l)$  case, which is possible only if  $A'(u_l) = A(u_l) + 1$ . Note that  $A'(u) = A(u)$  requires  $A'(u_r) = A(u_r)$  (and thus  $B'(u_r) = B(u_r)$ ) and that  $B'(u_l) + w_l + B(u_r) + w_r < \alpha$ , which is possible. Under this condition, we find:

763

764

765

766

767

768

769

$$B'(u) = \max(B'(u_l) + w_l, B(u_r) + w_r) \geq B(u_r) + w_r = B(u) \quad (4)$$

If instead  $B'(u_r) < B(u_r)$ , similar conditions can be written, resulting in

770

$$B'(u) = \max(B(u_l) + w_l, B'(u_r) + w_r) \geq B(u_l) + w_l \geq B(u_r) + w_r = B(u) \quad (5)$$

Thus,  $A(u)$  and  $B(u)$  are optimal when  $B(u_l) + w_l + B(u_r) + w_r > \alpha$ .

771

□

772

*Proof for Corollary 1.* Let  $o_r$  and  $o_l$  denote the right and the left child of the root of  $T^o$ . Every edge in  $T$  can be mapped to  $T^o$  except the edge  $(o_r, o_l)$ , from which we define a mapping to  $(o, o_r)$  (w.l.o.g). Using this mapping, the optimal clustering (i.e., optimal cut-set) on  $T$  can be translated to an alternative Max-diameter min-cut partitioning on  $T^o$ . However, by Theorem 1,  $A(o)$  is optimal and cannot be improved by any alternative partitioning. Since any admissible clustering on  $T^o$  is also admissible on  $T$ , Algorithm 1 minimizes the number of clusters.

773

774

775

776

777

778

779

□

780

## Linear-time solution for the Sum-length min-cut partitioning problem

781

782

We now show that Algorithm A is correct. Let  $A(u)$  be the minimum number of clusters under  $U$  all with a diameter less than  $\alpha$ ; i.e.,  $A(o)$  is the objective function.

783

784

---

**Algorithm A:** Linear-time solution for Sum-length min-cut partitioning

---

**Input:** A tree  $T^o = (V, E)$  and a threshold  $\alpha$

```
1  $B(u) \leftarrow 0$  for  $v \in V$ 
2 for  $u \in$  post order traversal of internal nodes of  $T^o$  do
3   if  $B(u_l) + w_l + B(u_r) + w_r > \alpha$  then
4     if  $B(u_l) + w_l \leq B(u_r) + w_r$  then
5        $E \leftarrow E - \{(u, u_r)\}$ 
6        $B(u) \leftarrow B(u_l) + w_l$ 
7     else
8        $E \leftarrow E - \{(u, u_l)\}$ 
9        $B(u) \leftarrow B(u_r) + w_r$ 
10  else
11     $B(u) \leftarrow B(u_l) + w_l + B(u_r) + w_r$ 
12 return Leafsets of every connected component in  $T^o$ 
```

---

**Theorem A.** Algorithm 1 computes a clustering with minimum  $A(o)$  for rooted tree  $T^o$ . In addition, among all possible such clusterings, the algorithm picks the solution with minimum  $B(o)$ . 785  
786  
787

*Proof.* The proof uses induction. The base case for the induction is the simple rooted tree with root  $u$  and two leaves  $u_l$  and  $u_r$ . If  $w_l + w_r > \alpha$ , the algorithm cuts the longer branch, whereas if  $w_l + w_r \leq \alpha$ , no branch is cut. In both cases, the theorem holds. 788  
789  
790

The inductive hypothesis is that, for a node  $u$ , the algorithm has computed  $A(u_l)$ ,  $A(u_r)$ ,  $B(u_l)$ , and  $B(u_r)$  optimally. We need to prove that a solution other than the one computed by our algorithm *i*) cannot have a lower number of clusters, call it  $A'(u)$ , and *ii*) when  $A'(u) = A(u)$ , cannot have a lower distance to the farthest connected leaf, call it  $B'(u)$ . 791  
792  
793  
794  
795

When  $B(u_l) + w_l + B(u_r) + w_r \leq \alpha$ , we have  $A(u) = A(u_l) + A(u_r) - 1$ , which is the minimum possible by the inductive hypothesis along with the fact that the number of clusters cannot decrease by more than one on node  $u$ . Also,  $B(u)$  is optimal by construction. 796  
797  
798  
799

When  $B(u_l) + w_l + B(u_r) + w_r > \alpha$ , without loss of generality, assume that  $B(u_l) + w_l \geq B(u_r) + w_r$ , and thus, the algorithm cuts the  $(u, u_l)$  branch, resulting in  $A(u) = A(u_l) + A(u_r)$  and  $B(u) = B(u_r) + w_r$ . Note that  $A'(u) < A(u)$  is only possible if  $A'(u_l) = A(u_l)$  and  $A'(u_r) = A(u_r)$  and we do not cut any branch at  $u$  in the alternative clustering. However, this scenario is *not* possible because

$$B'(u_l) + w_l + B'(u_r) + w_r \geq B(u_l) + w_l + B(u_r) + w_r > \alpha$$

where the first inequality follows from the inductive hypothesis and the final inequality shows that we will have to cut a branch in any alternative setting. Finally, we need to show that an alternative solution with  $A'(u) = A(u)$  but  $B'(u) < B(u)$  is not possible. The inequality requires that either  $B'(u_l) < B(u_l)$  or  $B'(u_r) < B(u_r)$ . First, consider the  $B'(u_l) < B(u_l)$  case, which is possible only if  $A'(u_l) = A(u_l) + 1$ . Note that  $A'(u) = A(u)$  requires  $A'(u_r) = A(u_r)$  (and thus  $B'(u_r) = B(u_r)$ ) and that  $B'(u_l) + w_l + B(u_r) + w_r < \alpha$ , which is possible. Under this condition, we find 800  
801  
802  
803  
804  
805  
806

$$B'(u) = B'(u_l) + w_l + B(u_r) + w_r \geq B(u_r) + w_r = B(u) \quad (6)$$

If, instead,  $B'(u_r) < B(u_r)$ , similar conditions can be written, resulting in 807

$$B'(u) = B(u_l) + w_l + B'(u_r) + w_r \geq B(u_l) + w_l \geq B(u_r) + w_r = B(u) \quad (7)$$

Thus,  $A(u)$  and  $B(u)$  are optimal when  $B(u_l) + w_l + B(u_r) + w_r > \alpha$ . □

**Corollary A.** *Let  $C'$  be the cut-set obtained by running Algorithm 1 on any arbitrary rooting  $T^\circ$  of unrooted tree  $T$ .  $C'$  optimally solves the Max-diameter min-cut partitioning problem.*

*Proof.* Let  $o_r$  and  $o_l$  denote the right and the left child of the root of  $T^\circ$ . Every edge in  $T$  can be mapped to  $T^\circ$  except the edge  $(o_r, o_l)$ , from which we define a mapping to  $(o, o_r)$  (w.l.o.g). Using this mapping, the optimal clustering (i.e., the optimal cut-set) on  $T$  can be translated to an alternative Max-diameter min-cut partitioning on  $T^\circ$ . However, by Theorem 1,  $A(o)$  is optimal and cannot be improved by any alternative partitioning. Since any admissible clustering on  $T^\circ$  is also admissible on  $T$ , Algorithm 1 minimizes  $q$ . □

### Proofs for the Single-linkage min-cut partitioning problem

*Proof of Proposition 1.* ( $\Leftarrow$ ) If  $d(a, b) \leq \alpha$  but  $a$  and  $b$  are in distinct clusters  $L_a, L_b$  respectively,  $N$  can be reduced by one by simply merging  $L_a$  and  $L_b$ .  $f_T(L_a \cup L_b) \leq \alpha$  is satisfied if for any split of  $L_a \cup L_b$ , there exists a pair of leaves that are from distinct splits and are within  $\alpha$  threshold. For any pair of non-empty sets  $S$  and  $S'$  that satisfy  $S \subset L_a$  and  $S' \subset L_b$ , we have  $\min_{j \in S \cup S', k \in (L_a \cup L_b) - (S \cup S')} d(j, k) \leq \min_{j \in S, k \in L_a - S} d(j, k) \leq \alpha$  and  $\min_{j \in S \cup (L_b - S'), k \in S' \cup (L_a - S)} d(j, k) \leq \min_{j \in S, k \in L_a - S} d(j, k) \leq \alpha$ . On the other hand,  $\min_{j \in L_a, k \in L_b - S} d(j, k) \leq d(a, b) \leq \alpha$ . This concludes that for  $L = L_a \cup L_b$ ,  $f_T(L) \leq \alpha$  is satisfied.  $L_a$  and  $L_b$  can still be merged if the chain  $\mathcal{H}$  described above exists. It is trivial to show that there is a link  $\langle c_i, c_{i+1} \rangle$  in  $\mathcal{H}$  such that  $c_i \in L_a$  and  $c_{i+1} \notin L_a$ . Using the argument above, we can iterate over  $\mathcal{H}$  and keep merging clusters (and decrease  $N$ ) every time we see such a link until we finally merge  $L_a$  with  $L_b$ .

( $\Rightarrow$ ) We describe a procedure to compute the chain  $\mathcal{H}$ . If  $a$  and  $b$  in the same cluster  $L$ ,  $\min_{k \in L - \{a\}} d(a, k) \leq \max_{S \subset L} \{ \min_{j \in S, k \in L - S} d(j, k) \} \leq \alpha$  holds, implying that there is a leaf  $c_1$  in set  $L - \{a\}$  such that  $d(a, c_1) \leq \alpha$ . If  $c_1 = b$ , theorem follows. If  $c_1 \neq b$ , we union  $a$  and  $c_1$ , call the union set  $L_a$ , and add the link  $a \rightarrow c_1$  to  $\mathcal{H}'$ . Iteratively, we find the pair  $\langle j, k \rangle$  that yields to  $\min_{j \in L_a, k \in L - L_a} d(j, k)$ , add the link  $j \rightarrow k$  to  $\mathcal{H}'$ , and add  $k$  to  $L_a$  until we finally add  $b$  to  $L_a$ . The elements forming the path between  $a$ , and  $b$  in  $\mathcal{H}'$ , which can be computed using depth-first-search, constitute a valid chain  $\mathcal{H}$ . □

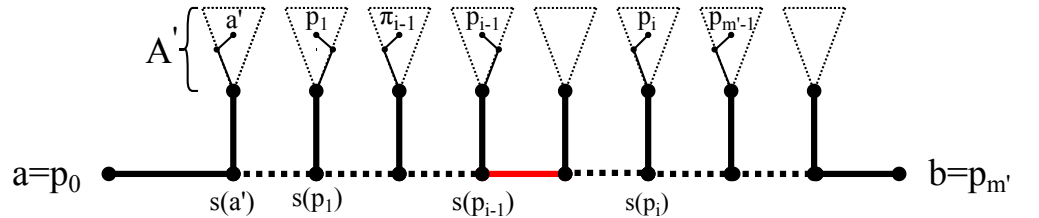

**Fig SA.** A sketch showing the setup for constructing the chain  $\mathcal{H}$ .

*Proof for Theorem 2.* Let  $a \rightsquigarrow b$  be the path between leaves  $a$  and  $b$  on  $T$ . Fixing  $a$  and  $b$ , for each node  $j$ , we use the term *support of  $j$* , denoted by  $s(j)$ , to refer to the unique node on all the three paths  $a \rightsquigarrow b$ ,  $a \rightsquigarrow j$ , and  $b \rightsquigarrow j$ . We refer to a group of leaves that share a mutual support with respect to  $a$  and  $b$  as a *bubble* (e.g. triangles in

Fig SA). Among all bubbles branching out of  $a \rightsquigarrow b$ , let the one with the closest support to  $a$  be  $A'$ . We name the leaf closest to  $a$  on  $A'$  as  $a'$  (Fig SA).

We start with the observation that if  $d(a, b) \leq \alpha$  holds, the algorithm will never cut any edge on  $a \rightsquigarrow b$ . For every internal node  $u$  on  $a \rightsquigarrow b$ , let  $v$  and  $w$  be the adjacent nodes on  $a \rightsquigarrow u$  and  $u \rightsquigarrow b$ , respectively. Also, let  $p_a$  be the closest leaf to  $u$  whose support  $s(p_a)$  is on  $a \rightsquigarrow u$ , and let  $p_b$  be the closest leaf to  $u$  whose support  $s(p_b)$  is on  $u \rightsquigarrow b$ . Now, note that  $d(p_a, u) + d(u, p_b) \leq d(a, u) + d(u, b) \leq \alpha$  holds, so regardless of the rooting,  $(v, u)$  and  $(u, w)$  are never cut by Algorithm 2.

If a chain  $\mathcal{H}$  exists, due to the previous observation, there are no cuts on  $c_i \rightsquigarrow c_{i+1}$  for every  $0 \leq i \leq m$ . Consequently,  $a$  and  $b$  are connected through a path and are thus in the same cluster.

Assume Algorithm 2 places  $a$  and  $b$  on the same cluster, i.e., it does not cut any edge on  $a \rightsquigarrow b$ . We present a procedure to generate a chain  $\mathcal{H}$  as described in Definition 5. But we first need some definitions. We define  $p_0 = a$  and  $p_{m'} = b$ . For  $1 \leq i \leq m'$ , let  $p_i$  denote the closest leaf to  $p_{i-1}$  whose support  $s(p_i)$  is on  $p_{i-1} \rightsquigarrow b$  and  $s(p_i) \neq s(p_{i-1})$ ; i.e.,  $p_i$  is in the bubble to the right of the bubble of  $p_{i-1}$ . Conversely, for  $1 \leq i \leq m'$ , let  $\pi_i$  denote the closest leaf to  $p_i$  whose support is on  $a \rightsquigarrow s(p_{i-1})$ ; i.e., is in a bubble to the left of  $p_i$ . Also define  $\pi_1 = a$ . We can also show that every  $\pi_i \in \{p_0 \dots p_{i-1}\}$ . If a  $\pi_i$  is not equal to one of  $\{p_0 \dots p_{i-1}\}$ , then,  $s(\pi_i)$  has to be on  $s(p_{j-1}) \rightsquigarrow s(p_j)$  for some  $j$ . However, we would have  $d(p_{j-1}, \pi_i) \leq d(p_{j-1}, p_j)$ , which contradicts the definition of  $p_i$ .

Now we construct the chain. The fact that Algorithm 2 retains  $(a, s(a'))$  indicates that  $\min(d(a, a'), d(a, p_1)) = d(a, p_1) \leq \alpha$ ; therefore, we add  $a \rightarrow p_1$  to an auxiliary graph  $\mathcal{H}'$ . Now, consider Algorithm 2 when it processes the node  $s(p_{i-1})$  for  $1 < i$ . The fact that the first edge on path  $s(p_{i-1}) \rightsquigarrow s(p_i)$  (shown in red in Fig SA) is not cut indicates that either  $d(\pi_{i-1}, p_i) \leq \alpha$  or  $d(p_{i-1}, p_i) \leq \alpha$ . Depending on which is true, we add a link from  $\pi_{i-1} \rightarrow p_i$  or  $p_{i-1} \rightarrow p_i$  to  $\mathcal{H}'$ . We repeat this process for all  $i$  until we reach  $i = m'$ , where we add an edge to  $p_{m'} = b$ . Noting that  $\pi_i \in \{p_0 \dots p_{i-1}\}$ , the  $\mathcal{H}'$  graph becomes a directed tree, rooted at  $a$  with a directed path to the leaf  $b$ . This directed path constitutes the valid chain  $\mathcal{H}$ .  $\square$

---

**Algorithm B:** AVERAGE DIAMETER CLADE Average diameter clade min-cut partitioning

---

```

1 for  $u \in$  post order traversal of  $T^o$  do
2    $totPairDist[u] \leftarrow 0$ ;  $totLeafDist[u] \leftarrow 0$ ;
3   if  $u$  in  $\mathcal{L}$  then
4      $numLeaves[u] \leftarrow 1$ ;  $avgPairDist[u] \leftarrow 0$ ;
5   else
6      $numLeaves[u] \leftarrow numLeaves[u_l] + numLeaves[u_r]$ ;
7      $totPairDist[u] \leftarrow totPairDist[u_l] + totPairDist[u_r] + totLeafDist[u_l] \times$ 
       $numLeaves[u_r] + totLeafDist[u_r] \times numLeaves[u_l]$ ;
8      $totLeafDist[u] \leftarrow totLeafDist[u_l] + w_l \times numLeaves[u_l] +$ 
       $totLeafDist[u_r] + w_r \times numLeaves[u_r]$ ;
       $avgPairDist[u] \leftarrow totPairDist[u] / \binom{numLeaves[u]}{2}$ ;
9  $toExplore \leftarrow$  queue containing the root of  $T^o$ ;
10 while  $toExplore \neq \emptyset$  do
11    $curr \leftarrow toExplore.dequeue()$ ;
12   if  $u$  not in  $\mathcal{L}$  and  $avgPairDist[u] > \alpha$  then
13      $E \leftarrow E \setminus (u, u_l)$ ;  $E \leftarrow E \setminus (u, u_r)$ ;
14      $toExplore.enqueue(u_l)$ ;  $toExplore.enqueue(u_r)$ ;
15 return Leafsets of every connected component in  $T^o$ 

```

---

874

## All optimal solutions

875

**Lemma A.** Let  $\{e_1, e_2, \dots, e_m\}$  be the set of edges in an unrooted tree  $T$ . Consider the following algorithm: root  $T$  at  $e_j$  and run Algorithm 1, and let  $\mathcal{S}_j$  denote the set of edges cut by the algorithm in this run. Any optimal clustering for  $T$  has to draw its cut-set from  $\Sigma = \cup_{j=1}^m \mathcal{S}_j$ .

876

877

878

879

*Proof.* The proof is by contradiction. Assume there is an optimal cut-set  $\mathcal{S}'$  that contains an edge  $e_i$  such that  $e_i \notin \Sigma$ . Consider the rooting of  $T$  at  $e_i$ . Denote the root of this tree as  $v$ , the immediate left and right branches of  $v$  as  $e_l$  and  $e_r$ , and the left and right child nodes of  $v$  as  $v_l$  and  $v_r$ . Note that the concatenation of  $e_l$  and  $e_r$  corresponds to  $e_i$  in  $T$ ; thus,  $e_l \notin \mathcal{S}_j$  and  $e_r \notin \mathcal{S}_j$ . When  $e_i$  is removed from  $T$ , two new trees form, called  $T_l$  (the one containing the node  $v_l$ ) and  $T_r$  (the one containing the node  $v_r$ ). If  $p$  cuts in  $\mathcal{S}'$  are in  $T_r$ , and if  $q$  cuts in  $\mathcal{S}'$  are in  $T_l$ , then  $|\mathcal{S}'| = p + q + 1$ . The number of cuts in  $\mathcal{S}'$  and  $\mathcal{S}_j$  are equal, and  $e_l$  and  $e_r$  are not cut, which implies that either the tree rooted by  $v_l$  or  $v_r$  has an alternative clustering with one less cut. By the design of Algorithm 1, if this was the case, the algorithm would have chosen the alternative cut.  $\square$

880

881

882

883

884

885

886

887

888

889

890

## Commands and parameters

891

**Ancestral state reconstruction using TreeTime.** Each cluster tree is first rooted at its balance point using MinVar rooting version (commit 8c1581a):

892

893

```

$ python FastRoot.py -i unrooted_tree.nwk -m MV
-o rooted_tree.nwk

```

894

895

Before performing maximum likelihood ancestral state reconstruction, we inferred GTR parameters from the input tree using RAxML v8.2.12:

896

897

```

$ raxmlHPC-PTHREADS -f e -t ../input_tree.nwk -s aln.fa      898
-m GTRGAMMA -n tre -T 4                                     899

```

We manually hardcoded those parameters into built-in TN93 parameters matrix in  
treetime software (v0.5.5) and reconstructed ancestral states of rooted tree using this  
command: 902

```

$ treetime ancestral --tree rooted_tree.nwk --aln aln.fa    903
--outdir outdir --gtr TN93                                  904

```

**Listing A.** Default FAVITES Parameters

```

{
  "ContactNetworkGenerator": "Communities",
  "cn_generators": [{
    "ContactNetworkGenerator": "BarabasiAlbert",
    "num_cn_nodes": 5000,
    "num_edges_from_new": 5
  }]*20,
  "cn_p_across": 1/(2*19*5000),
  "NodeEvolution": "VirusTreeSimulator",
  "vts_growthRate": 2.851904,
  "vts_max_attempts": 100,
  "vts_model": "logistic",
  "vts_n0": 1,
  "vts_t50": -2,
  "NumBranchSample": "Single",
  "NumTimeSample": "Once",
  "SeedSelection": "Random",
  "num_seeds": 15000,
  "SeedSequence": "VirusNonHomYuleHeightGTRGamma",
  "seed_height": 25,
  "seed_speciation_rate_func": "exp(-t**2)+1",
  "viral_sequence_type": "HIV1-B-DNA-POL-LITTLE",
  "seqgen_freq_a": 0.392,
  "seqgen_freq_c": 0.165,
  "seqgen_freq_g": 0.212,
  "seqgen_freq_t": 0.232,
  "seqgen_a_to_c": 1.765707,
  "seqgen_a_to_g": 9.587649,
  "seqgen_a_to_t": 0.691915,
  "seqgen_c_to_g": 0.863348,
  "seqgen_c_to_t": 10.282617,
  "seqgen_g_to_t": 1.0,
  "seqgen_gamma_shape": 0.405129,
  "seqgen_num_gamma_rate_categories": "",
  "SequenceEvolution": "GTRGammaSeqGen",
  "Sequencing": "Perfect",
  "SourceSample": "Random",
  "TimeSample": "GranichFirstART",
  "TransmissionTimeSample": "HIVARTGranichGEMF",
  "end_time": 10,
  "hiv_freq_ns": 0,
  "hiv_freq_i3": 0,

```

```

" hiv_freq_i4": 0, 947
" hiv_freq_a3": 0, 948
" hiv_freq_a4": 0, 949
" hiv_freq_d": 0, 950
" hiv_freq_s": 100000-15000, 951
" hiv_freq_i1": 50, 952
" hiv_freq_i2": 5094, 953
" hiv_freq_a1": 9, 954
" hiv_freq_a2": 15000-50-5094-9, 955
" hiv_a1_to_a2": 4.333333333333333, 956
" hiv_a1_to_d": 0, 957
" hiv_a1_to_i1": 0.48, 958
" hiv_a2_to_a3": 0, 959
" hiv_a2_to_d": 0, 960
" hiv_a2_to_i2": 0.48, 961
" hiv_a3_to_a4": 0, 962
" hiv_a3_to_d": 0, 963
" hiv_a3_to_i3": 0, 964
" hiv_a4_to_d": 0, 965
" hiv_a4_to_i4": 0, 966
" hiv_i1_to_a1": 1.0, 967
" hiv_i1_to_d": 0, 968
" hiv_i1_to_i2": 8.666666666666666, 969
" hiv_i2_to_a2": 1.0, 970
" hiv_i2_to_d": 0, 971
" hiv_i2_to_i3": 0, 972
" hiv_i3_to_a3": 0, 973
" hiv_i3_to_d": 0, 974
" hiv_i3_to_i4": 0, 975
" hiv_i4_to_a4": 0, 976
" hiv_i4_to_d": 0, 977
" hiv_ns_to_d": 0, 978
" hiv_ns_to_s": 999999, 979
" hiv_s_to_d": 0, 980
" hiv_s_to_il_by_a1": 0.005625, 981
" hiv_s_to_il_by_a2": 0, 982
" hiv_s_to_il_by_a3": 0, 983
" hiv_s_to_il_by_a4": 0, 984
" hiv_s_to_il_by_i1": 0.1125, 985
" hiv_s_to_il_by_i2": 0.0225, 986
" hiv_s_to_il_by_i3": 0, 987
" hiv_s_to_il_by_i4": 0, 988
" hiv_s_to_il_seed": 0, 989
" TreeUnit": "TruncatedNormal", 990
" tree_rate_loc": 0.0008, 991
" tree_rate_max": float('inf'), 992
" tree_rate_min": 0, 993
" tree_rate_scale": 0.0005, 994
" ContactNetwork": "NetworkX", 995
" Driver": "Default", 996
" EndCriteria": "GEMF", 997
" Logging": "File", 998

```

```
"NodeAvailability": "Perfect",
"TransmissionNodeSample": "GEMF",
"TreeNode": "Simple",
"gemf_path": "GEMF",
"hmmemit_path": "hmmemit",
"java_path": "java",
"out_dir": "FAVITES_output",
"seqgen_path": "seq-gen",
}
```
